# Supplementary material for: Neurotransmitters, emotions, and well-being vs. burnout in nurses: a scoping review
Source: Research Square preprint supplement (doi:10.21203/rs.3.rs-8377718/v1), 2026-01-16
Supplement: Supplementary file 1 [file 237635bf8170fbd9aab38b04.docx]

Table S2 - Data extraction per article analyzed

| **Title/type of study** | **Author** | **Source** | **Population** | **Context** | **Concept** | **Main contributions** |
| --- | --- | --- | --- | --- | --- | --- |
| *The mediating role of empathy in the impact of compassion fatigue on burnout among nurses.*  Cross-sectional, correlational, and descriptive study | To Topçu, N., Akbolat, M., & Amarat, M. | (Topçu et al., 2023) | Nurses | Clinical practice | Burnout | As nurses' burnout levels increase, undesirable situations such as compassion fatigue may arise for themselves, patients, and institutions. |
| *The dual roles of empathy in mediating structural empowerment and compassion fatigue among.*  Cross-sectional study | Shen, X., Bu, H., Zhang, J., Duan, W., Wang, H., Tao, Y., & Qiao, Z. | (Shen et al., 2024) | Nurses. | Clinical practice | Empathy | Relationship between structural empowerment, empathy (cognitive and affective), and compassion fatigue; Strategies to mitigate compassion fatigue. Also contributes to improving nurses' well-being |
| *“Compassion Fatigue” is a Misnomer: How Compassion Can Increase Quality of Life*. Review study | DeDecker, Jennifer | (DeDecker, 2020) | Nurses | Clinical practice | Burnout; mindfulness; compassion. | Empathic suffering leads to fatigue, suggesting that mindfulness practice and compassion training can protect and empower healthcare professionals. |
| *The Impact of Mindfulness-Based Stress Reduction on Workplace Well-Being and Empathy Levels Among Nurses Working in Psychiatric Wards in Iran.*  Clinical trial study | Fatemi, J., Vagharseyyedin, S. A., & Askari-Noghani, A. | (Fatemi et al., 2024) | Nurses | Clinical practice in psychiatry | Mindfulness; well-being; empathy. | MBSR can be a beneficial tool for improving well-being at work and levels of empathy between nurses and patients working in psychiatric wards. |
| *Interventions to Reduce Compassion Fatigue in Nursing: A Systematic Review and Meta‐Analysis of Controlled Studies.*  Systematic Review Study | Manzanedo-Moreno, M., Salcedo-Sampedro, C., Abajas-Bustillo, R., Martin-Melón, R., Peña, R. F., & Ortego-Maté, C. | (Manzanedo-Moreno et al., 2025) | Nurses | Clinical practice | Compassion; empathy; burnout and resilience. | Compassion fatigue is the emotional response generated by continuous exposure to human suffering and is especially common among nursing professionals. This phenomenon can lead to decreased empathy and increased emotional exhaustion, affecting the quality of care. |
| *The Association between Perceived Job Stress and Satisfaction, Empathy, and Spiritual Beliefs on Burnout and Emotional Distress in Nurses: A Cross-sectional Study* | Debnath, S., Sathiyaseelan, M., Tharyan, P., & Mahasampath, G. | (Debnath et al. 2024 a) | Nurses | Clinical practice | Stress;  Empathy; Burnout. | Empathy and spiritual beliefs are related to burnout syndrome and emotional distress in nurses. |
| *Work-related stressors and psychological distress predict career change ideation among Lithuanian healthcare workers.*  Quantitative meta-analysis study | Kavaliauskas, P., Nomeikaite, A., Gelezelyte, O., Kazlauskas, E., & Smailyte, G. | (Kavaliauskas et al., 2024) | Nurses, among other healthcare professionals | Clinical practice | Stress; depression; anxiety. | Depression, Anxiety, and Stress Scale - 21 (DASS-21). |
| *Relationship between organizational commitment, working environment, and burnout in clinical nurses.*  Descriptive correlational study | Alinejad-Naeini, M., Ghasemi, M., Mirzaee, M. S., & Heidari-Beni, F. | (Alinejad-Naeini et al., 2024) | Nurses | Clinical practice | Burnout | Relationship between the nursing profession and absenteeism and burnout. Importance of positive working conditions to ensure the commitment and well-being of clinical nurses. |
| *Associations among professional quality of life dimensions, burnout, nursing practice environment, and turnover intention in newly graduated nurses.*  Cross-sectional study | Gong, S., Li, J., Tang, X., & Cao, X. | (Gong et al., 2022) | Newly graduated nurses | Clinical practice | Burnout;  quality of professional life;  compassion. | The nursing practice environment, social support, and empathy indirectly and significantly affected turnover intention. |
| *Burnout and Physical Activity as Predictors of Job Satisfaction Among Peruvian Nurses: The Job Demands-Resources Theory.*  Cross-sectional study | Romero-Carazas, R., Almanza-Cabe, R. B., Valero-Ancco, V. N., Espíritu-Martínez, A. P., Espinoza-Casco, R. J., Garro-Aburto, L. L., Vizcarra-Quiñones, A. M., Samaniego-Montoya, C. M., Denegri-Velarde, M. I., & Ochoa-Tataje, F | (Romero-Carazas et al., 2024b) | Nurses | Clinical practice | Burnout; physical activity; job satisfaction. | Physical activity has positive effects on psychological well-being and can play a crucial role in mitigating burnout and improving job satisfaction. |
| *The effectiveness of mindfulness-based interventions on the psychological well-being of nurses: A systematic review*  Systematic review following the PRISMA protocol | [Virpi Sulosaari](https://pubmed.ncbi.nlm.nih.gov/?sort=date&term=Sulosaari+V&cauthor_id=35307128), [Eda Unal](https://pubmed.ncbi.nlm.nih.gov/?sort=date&term=Unal+E&cauthor_id=35307128), [Fatma Ilknur Cinar](https://pubmed.ncbi.nlm.nih.gov/?sort=date&term=Cinar+FI&cauthor_id=35307128) | (Sulosaari et al., 2022) | Nurses | Clinical practice | Stress; depression; anxiety; burnout; resilience; quality of life; self-compassion; happiness; mindfulness. | Mindfulness-based interventions have the potential to improve the psychological well-being of nurses. |
| *The impact of laughter yoga as a NIC on health parameters in nurses and nursing students: a systematic review*  Systematic review study | [Özüm Erkin](https://bmccomplementmedtherapies.biomedcentral.com/articles/10.1186/s12906-024-04663-3#auth-_z_m-Erkin-Aff1),  [Elem Kocaça](https://bmccomplementmedtherapies.biomedcentral.com/articles/10.1186/s12906-024-04663-3#auth-Elem-Koca_al-Aff2) | (Erkin & Kocaçal, 2024) | Nurses and nursing students | Clinical practice | Stress; burnout; depression; anxiety; cortisol;  pranayama. | Laughter yoga Pranayama as a nursing intervention has been shown to be a non-invasive, easy, effective practice that can be applied independently by nurses. |
| *Professional quality of life and job satisfaction among nurses working at tertiary hospitals in central Ethiopia.*  Descriptive cross-sectional study | [Sentayehu Admasu Saliya](https://bmcnurs.biomedcentral.com/articles/10.1186/s12912-024-02101-w#auth-Sentayehu_Admasu-Saliya-Aff1) ,  [Taye Mezgebu Ashine](https://bmcnurs.biomedcentral.com/articles/10.1186/s12912-024-02101-w#auth-Taye_Mezgebu-Ashine-Aff1), [Asnakech Zekiwos Heliso](https://bmcnurs.biomedcentral.com/articles/10.1186/s12912-024-02101-w#auth-Asnakech_Zekiwos-Heliso-Aff1) ,  [Getachew Ossabo Babore](https://bmcnurs.biomedcentral.com/articles/10.1186/s12912-024-02101-w#auth-Getachew_Ossabo-Babore-Aff1) ,  [Bethelhem Birhanu](https://bmcnurs.biomedcentral.com/articles/10.1186/s12912-024-02101-w#auth-Bethelhem-Birhanu-Aff1) &  [Awoke Girma Hailu](https://bmcnurs.biomedcentral.com/articles/10.1186/s12912-024-02101-w#auth-Awoke_Girma-Hailu-Aff1) | (Saliya et al., 2024) | Nurses | Clinical practice | Quality of life; job satisfaction; compassion fatigue  compassion. | Recommendations for developing targeted training programs, implementing workplace policies, and creating initiatives to improve education, experience, and satisfaction with compassion |
| *Evaluating and Enhancing Nursing Caregiver Well-being Using a Systematic Approach.*  Descriptive, cross-sectional study, mixed methods | Concepción Salcedo Sampedro Rosario Fernández-Peña, Noelia Ruiz Pellón  Roberto Martín Melón Carmen Ortego-Maté | (Galuska et al., 2024) | Nurses | Clinical practice | Burnout;  Mindfulness | Coping strategies, mindfulness, and relaxation significantly reduced emotional exhaustion and depersonalization. |
| *Mindfulness-Based Intervention for the Reduction of Compassion Fatigue and Burnout in Nurse Caregivers of Institutionalized Older Persons with Dementia: A Randomized Controlled Trial*.  Randomized controlled clinical trial study. | Pérez, V., Menéndez-Crispín, E. J., Sarabia-Cobo, C., de Lorena, P., Fernández-Rodríguez, A., & González-Vaca, J. | (Pérez et al., 2022) | Nurses | Elder care practice | [Burnout](https://www.mdpi.com/search?q=burnout); [compassion fatigue](https://www.mdpi.com/search?q=compassion+fatigue);  Stress. | Mindfulness-based intervention appears to be effective in reducing compassion fatigue and burnout syndrome. |
| 16 (1 *Critical factors shaping vicarious posttraumatic growth in nurses: a cross-sectional study.*  Cross-sectional study | [Yitong Cai](https://bmcnurs.biomedcentral.com/articles/10.1186/s12912-025-02939-8#auth-Yitong-Cai-Aff1) ,  [Jie Zhang](https://bmcnurs.biomedcentral.com/articles/10.1186/s12912-025-02939-8#auth-Jie-Zhang-Aff2) ,  [Yifei Li](https://bmcnurs.biomedcentral.com/articles/10.1186/s12912-025-02939-8#auth-Yifei-Li-Aff1) ,  [Juan Li](https://bmcnurs.biomedcentral.com/articles/10.1186/s12912-025-02939-8#auth-Juan-Li-Aff1) ,  [Weixiang Luo](https://bmcnurs.biomedcentral.com/articles/10.1186/s12912-025-02939-8#auth-Weixiang-Luo-Aff3) ,  [Jingping Zhang](https://bmcnurs.biomedcentral.com/articles/10.1186/s12912-025-02939-8#auth-Jingping-Zhang-Aff1) &  [Chaoran Qu](https://bmcnurs.biomedcentral.com/articles/10.1186/s12912-025-02939-8#auth-Chaoran-Qu-Aff4) | (Cai et al., 2025) | Nurses | Clinical practice | Vicarous Post-Traumatic Growth (VPTGI) anxiety; depression; stress. | Nurses who progress in their careers develop greater emotional resilience and coping mechanisms, which are crucial for dealing with the complexities of their roles. |
| *Spiritual Intelligence in Healthcare Practice and Servant Leadership as Predictors of Work Life Quality in Peruvian Nurses.*  Explanatory cross-sectional study | Paula K. Dávila-Valencia  Belvi J. Gala-Espinoza  Wilter C. Morales-García | (Dávila-Valencia et al., 2025) | Nurses | Clinical practice | Spiritual intelligence;  leadership; quality of life. | Spiritual intelligence and servant leadership are key predictors of quality of life at work among Peruvian nurses. |
| 18 (*1How to foster nurses’ well-being and performance in the face of work pressure? The role of mindfulness as a personal resource.*  Cross-sectional study | Janssen, E., Van Strydonck, I., Decuypere, A., Decramer, A., & Audenaert, M. | (Janssen et al., 2020) | Nurses | Geriatric clinical practice | Mindfulness; Well-being;  Work pressure. | Mindfulness is a personal resource that is relevant in the work context. |
| 19  *1Exploring resilience among hospital workers: a Bayesian approach.*  Cross-sectional study | Laura Uccella, Ilenia Mascherona, Sebastiano Semini, Sara Uccella | (Uccella et al., 2024) | Nurses and other hospital professionals | Clinical practice; differentiated care | Well-being;  Resilience. | Resilience is crucial for more effective management in health systems and  development of employment policies, while also mitigating the shortage  of healthcare professionals. |
| 20 *2Analysis of Compassion Fatigue Among Psychiatric Nurses and Its Effect on Spiritual and Competent Care.*  The Cross-sectional and correlational study. | Hamzaa, H. G., Abdelaal, M. H., Hussein Ramadan Atta, M., Abdelnaby, H. S. M., & Othman, A. A. | (Hamzaa et al., 2025b) | Nurses | Clinical practice in psychiatry | Empathy;  compassion;  well-being;  spiritualities. | Significant relationships between compassion fatigue, spirituality, spiritual care, and competence among psychiatric nurses.  The instruments used Compassion Fatigue Self-Assessment Scale (CFST), Spirituality and Spiritual Care Rating Scale (SSCRS), Self-Esteem and Competence Scale - Revised Version (SLCS-R) |
| 21 *The Impact of Emotional Intelligence on Nurses’ Professional Quality of Life in Pre-Hospital Emergency Settings: A Multicenter Mixed-Method Study.*  Mixed study qualitative approach | Musio, M. E., Ginogi, F., Casini, S., Lucente, G., Timmins, F., Hayter, M., Catania, G., Zanini, M., Aleo, G., Sasso, L., & Bagnasco, A. | (Musio et al., 2025b) | Nurses | Pre-hospital emergency nurses | Burnout;  stress;  well-being;  emotional intelligence. | Use of the Prehospital Emergency Professional Quality of Life Scale (PHE-ProQoL).  Burnout and post-traumatic stress significantly affect pre-hospital emergency nurses. Nursing managers have access to a validated and reliable tool to assess this aspect. |
| 22 *Development and Implementation of a Multidimensional Narrative Support System for Emergency Nurses: An Action Research.*  Mixed methods action research study | Yu, H., Deng, Y., Gui, L., & Xu, H. | (H. Yu et al., 2024) | Nurses | Emergency practice | Work pressure;  Quality of life | Nursing Management: The multidimensional narrative support system can act as an innovative intervention for the overall improvement of emergency clinical nurses. |
| 23 *Compassion fatigue in community nursing: what is it, who is susceptible, and what can be done?*  Exploratory study | Baker, J., & Vincent, R. | (Baker & Vincent, 2024b) | Nurses | Community clinical practice | Superhelper syndrome;  Cognitive empathy;  emotional empathy;  compassion. | Community nurses are susceptible to compassion fatigue because their role attracts people who have a strong desire to help others and because their work is emotionally  Challenging They must take care of themselves to avoid compassion fatigue. |
| 24 *The relationship between oncology nurses’ emotional intelligence, burnout, and patient-centered communication: a cross-sectional study.*  Cross-sectional study | Alodhialah, A. M. | (Alodhialah, 2025b) | Nurses | Clinical practice in oncology nursing | Burnout;  Well-being;  Emotional intelligence. | Integrating EI development into professional training and wellness initiatives can improve both the quality of communication and the well-being of nurses in emotionally demanding care environments |
| 25 2 *Using an experience-based co-design approach to address mental health issues among healthcare workers and leaders in long-term care.*  Focus group study | Boamah, S. A., Sedzro, M. T., Kabir, H., Vrkljan, B., Mitchell, S., De La Torre Pérez, L., & Santero, M. | (Boamah et al., 2025b) | Caregivers, nurses, social workers, and leading administrators. | Clinical practice in continuing care | Burnout;  psychological distress. | Instruments: Maslach Burnout Inventory-Human Services Survey  Urgent need for tailored systemic interventions to effectively address burnout and psychological distress among CLD workers and leaders. |
| *The work environment of hemodialysis nurses and its mediating role in burnout*  Multicenter cross-sectional study | [Ioannis Moisoglou,](https://onlinelibrary.wiley.com/authored-by/Moisoglou/Ioannis) [Aris Yfantis,](https://onlinelibrary.wiley.com/authored-by/Yfantis/Aris)  [Erasmia Tsiouma,](https://onlinelibrary.wiley.com/authored-by/Tsiouma/Erasmia) [Petros Galanis](https://onlinelibrary.wiley.com/authored-by/Galanis/Petros) | (Moisoglou et al., 2021) | Nurses | Nurses in clinical practice in hemodialysis | Burnout | Nursing Work Index Practice Environment Scale (PES-NWI) used  The work environment of hemodialysis nurses was associated with burnout. It is important for administrations to make efforts to ensure the well-being of the nursing team. |
| *Composing a Life that Works with a Life that Counts for Nurses*  Review study | [Dorrie K Fontaine](https://pubmed.ncbi.nlm.nih.gov/?sort=date&term=Fontaine+DK&cauthor_id=37551000) | (Fontaine, 2023) | Nurses | Clinical practice/intensive care | Healthy work;  well-being  burnout;  depression; meaningful recognition. | The American Association of Critical-Care Nurses' standards for a healthy work environment are used to frame the benefits of an integrated life. Strategies are described for achieving an integrated life, with meaning and purpose, to create more happiness and joy and begin to mitigate the nursing shortage.  Business and organizational leaders encourage their employees to have a "work-life balance." |
| *Beyond the NURSE Acronym: The Functions of Empathy in Serious Illness Conversations.*  Review study | Julie W. Childers, Hailey Bulls, Robert Arnold, | Childers et al., 2023) | Nurses | Clinical practice/palliative care | Empathetic communication;  empathy. | NURSE framework  Mindfulness helps us deal with our own stories and emotions so we can provide the best care. In interactions with other healthcare professionals, if we can understand how emotions and other contextual factors influence decisions about patient care, we will be better able to deal with conflicts |
| *From exclusion to deviance: understanding the impact of workplace ostracism on nurses’ deviant behaviors through emotional exhaustion and defensive silence.*  Descriptive correlational study | [Nora Mahdy Attia](https://bmcnurs.biomedcentral.com/articles/10.1186/s12912-025-03427-9#auth-Nora_Mahdy-Attia-Aff1), [Manal Saleh Moustafa Saleh](https://bmcnurs.biomedcentral.com/articles/10.1186/s12912-025-03427-9#auth-Manal_Saleh_Moustafa-Saleh-Aff2), [Sahar Hamdy El-Sayed](https://bmcnurs.biomedcentral.com/articles/10.1186/s12912-025-03427-9#auth-Sahar_Hamdy-El_Sayed-Aff3), [Marwa Abd El-fatah Ali El-slamoni](https://bmcnurs.biomedcentral.com/articles/10.1186/s12912-025-03427-9#auth-Marwa_Abd_El_fatah-Ali_El_slamoni-Aff4-Aff5), [Mona Gamal Abd Elnaser Ahmed Elnabawy](https://bmcnurs.biomedcentral.com/articles/10.1186/s12912-025-03427-9#auth-Mona_Gamal_Abd_Elnaser-Ahmed_Elnabawy-Aff4-Aff6), [Azza Abdeldayem Ata](https://bmcnurs.biomedcentral.com/articles/10.1186/s12912-025-03427-9#auth-Azza_Abdeldayem-Ata-Aff1), [Abdelaziz Hendy](https://bmcnurs.biomedcentral.com/articles/10.1186/s12912-025-03427-9#auth-Abdelaziz-Hendy-Aff7), [Enas M. Bassuni](https://bmcnurs.biomedcentral.com/articles/10.1186/s12912-025-03427-9#auth-Enas_M__-Bassuni-Aff3) , & [Hanan Meslhy Mohamed](https://bmcnurs.biomedcentral.com/articles/10.1186/s12912-025-03427-9#auth-Hanan_Meslhy-Mohamed-Aff1) | (Attia et al., 2025) | Nurses | Clinical practice | Ostracism in the workplace  Emotional exhaustion  Defensive silence | Workplace ostracism influences deviant behavior among nurses both directly and indirectly, through emotional exhaustion and defensive silence |
| *Exposure to workplace bullying and nurses’ turnover intentions nexus: a moderation-mediation analysis.*  Descriptive quantitative study | [Samuel Atingabili](https://bmcpsychology.biomedcentral.com/articles/10.1186/s40359-025-03008-0#auth-Samuel-Atingabili-Aff1), [Hao Chen](https://bmcpsychology.biomedcentral.com/articles/10.1186/s40359-025-03008-0#auth-Hao-Chen-Aff1) , [Francisca Arboh](https://bmcpsychology.biomedcentral.com/articles/10.1186/s40359-025-03008-0#auth-Francisca-Arboh-Aff2), [Isaac Adjei Mensah](https://bmcpsychology.biomedcentral.com/articles/10.1186/s40359-025-03008-0#auth-Isaac_Adjei-Mensah-Aff3-Aff4), [Nick Yvan Ngansom Kewou](https://bmcpsychology.biomedcentral.com/articles/10.1186/s40359-025-03008-0#auth-Nick_Yvan_Ngansom-Kewou-Aff1) &  [Bismark Sakpiti Maalisuo](https://bmcpsychology.biomedcentral.com/articles/10.1186/s40359-025-03008-0#auth-Bismark_Sakpiti-Maalisuo-Aff1) | (Atingabili et al., 2025) | nurses | Clinical practice | Moral harassment  Emotional exhaustion | Supportive organizational climates and effective conflict management strategies contribute to mitigating the adverse effects of bullying, improving nurses' well-being, and reducing turnover intentions. Healthcare organizations should prioritize interventions that address workplace bullying and promote a positive work environment to retain a motivated and committed nursing workforce. |
| *Serotonin variations and sleep disorders among shift workers. A cross-sectional study*  Cross-sectional study | [Rehab Shehata Abdelhady Shehata](https://pubmed.ncbi.nlm.nih.gov/?sort=date&term=Shehata+RSA&cauthor_id=34493125), [Zeinab Ahmed Mohamed Nour](https://pubmed.ncbi.nlm.nih.gov/?sort=date&term=Mohamed+Nour+ZA&cauthor_id=34493125), [Amul Mohamed Abdelrahim Badr](https://pubmed.ncbi.nlm.nih.gov/?sort=date&term=Abdelrahim+Badr+AM&cauthor_id=34493125), [Eman Mahmoud Khalifa](https://pubmed.ncbi.nlm.nih.gov/?sort=date&term=Khalifa+EM&cauthor_id=34493125) | (Shehata et al., 2021) | Healthcare workers,  nurses | Clinical shift practice | Sleep disorders;  serotonin | SWN, especially nurses working rotating and night shifts, suffer from poor sleep quality associated with abnormal serotonin levels in the blood. |
| *Cortisol Awakening Response and Stress in Female Nurses on Monthly Shift Rotations: A Longitudinal Study.*  Prospective longitudinal study with intentional sampling. | [Yu-Huei Lin](https://pubmed.ncbi.nlm.nih.gov/?term=%22Lin%20YH%22%5BAuthor%5D) , [Hsiu-Ju Jen](https://pubmed.ncbi.nlm.nih.gov/?term=%22Jen%20HJ%22%5BAuthor%5D) , [Yen-Kuang Lin](https://pubmed.ncbi.nlm.nih.gov/?term=%22Lin%20YK%22%5BAuthor%5D) , [Jang-Dong Seo](https://pubmed.ncbi.nlm.nih.gov/?term=%22Seo%20JD%22%5BAuthor%5D) , [Wen-Pei Chang](https://pubmed.ncbi.nlm.nih.gov/?term=%22Chang%20WP%22%5BAuthor%5D) | (Lin et al., 2022) | Nurses |  | Cortisol;  Stress | Saliva samples allowed for the analysis of increased cortisol levels after waking (RCDi) in nurses working different shifts (day, evening, and night). |
| *Global prevalence and contributing factors of nurse burnout: an umbrella review of systematic review and meta-analysis.*  Review study | [Addisu Getie](https://bmcnurs.biomedcentral.com/articles/10.1186/s12912-025-03266-8#auth-Addisu-Getie-Aff1),  [Temesgen Ayenew](https://bmcnurs.biomedcentral.com/articles/10.1186/s12912-025-03266-8#auth-Temesgen-Ayenew-Aff1),  [Baye Tsegaye Amlak](https://bmcnurs.biomedcentral.com/articles/10.1186/s12912-025-03266-8#auth-Baye_Tsegaye-Amlak-Aff1), [Mihretie Gedfew](https://bmcnurs.biomedcentral.com/articles/10.1186/s12912-025-03266-8#auth-Mihretie-Gedfew-Aff1) , [Afework Edmealem](https://bmcnurs.biomedcentral.com/articles/10.1186/s12912-025-03266-8#auth-Afework-Edmealem-Aff1)  [Worku Misganaw Kebede](https://bmcnurs.biomedcentral.com/articles/10.1186/s12912-025-03266-8#auth-Worku_Misganaw-Kebede-Aff1) | (Getie et al., 2025) | Nurses | Clinical practice | Burnout;  Well-being | Burnout syndrome in nurses significantly impacts the mental well-being of these professionals, causing exhaustion and demotivation, as well as affecting patient care, organizational productivity and th , and the overall quality of healthcare. |
