# Supplementary material for: Neurotransmitters, emotions, and well-being vs. burnout in nurses: a scoping review
Source: Research Square preprint supplement (doi:10.21203/rs.3.rs-8377718/v1), 2026-01-16
Supplement: Supplementary file 2 [file c2dafeb719ca0c5fe2d61f84.docx]

| **Database** | **Search Strategy** | **Number of articles** | **Excluded** |
| --- | --- | --- | --- |
| CINHAL Ultimate  (via EBSCO Host) | Search by publications: nurse OR nurses OR nursing) AND ((happiness OR well-being)) AND (((burnout OR fatigue OR stress) AND (nursing staff OR nurses OR healthcare workers))) AND ((empathy AND nursing)) | 44 | A total of 30 articles were excluded for the following reasons:  Six articles: the population consisted of nursing students or non-nurses;  Six articles: conducted exclusively during the COVID-19 pandemic;  Three articles: commentaries or prefaces;  Two articles: focused on experiences in disasters or criminal circumstances;  One article: presented as a poster at a scientific event;  Twelve articles: duplicates. |
| MedicLatina  (via EBSCO Host) | Search by publications: nurse OR nurses OR nursing) AND ((happiness OR well-being)) AND (((burnout OR fatigue OR stress) AND (nursing staff OR nurses OR healthcare workers))) AND ((empathy AND nursing)) | 1 |
| Cochrane Central Register of Controlled Trials Psychology and Behavioral Sciences Collection  (via EBSCO Host) | Search by publication: nurse OR nurses OR nursing) AND ((happiness OR well-being)) AND (((burnout OR fatigue OR stress) AND (nursing staff OR nurses OR healthcare workers))) AND ((empathy AND nursing)) | 2 |
| Medline Ultimate  (via EBSCO Host) | Search by publications: nurse OR nurses OR nursing) AND ((happiness OR well-being)) AND (((burnout OR fatigue OR stress) AND (nursing staff OR nurses OR healthcare workers))) AND ((empathy AND nursing))39 peer-reviewed, articles, full text - natural language | 12 |

Table S1 – Primary research
